# Supplementary material for: Size-dependent growth tactics of a partially migratory fish before migration
Source: Research Square preprint supplement (doi:10.21203/rs.3.rs-279594/v1), 2021-03-02
Supplement: Supplementary file 1 [file f93e4e82d9b08c10f6e35da7.docx]

**Size-dependent growth tactics of a partially migratory fish before migration**

Ryo Futamura, Kentaro Morita, Yoichiro Kanno, Shoji Kumikawa, Yuichi Matsuoka, Atsushi Okuda, Hiroshi Sugiyama, Hiroyuki Takahashi, Jiro Uchida, Osamu Kishida*

* Corresponding author: kishida@fsc.hokudai.ac.jp

***Statistical analyses on growth rate***

| **Table S1.** Formulae of eight models used to test the first prediction. | | | |
| --- | --- | --- | --- |
| Model | Response variable | Fixed factor | Random factor |
| A | GR of FL in winter period | FL at autumn, Life history, Year, Habitat section and their interaction |  |
| B | GR of BM in winter period | BM at autumn, Life history, Year, Habitat section and their interaction |  |
| C | GR of FL in winter period | FL at autumn, Life history, Year and their interaction | Habitat section |
| D | GR of BM in winter period | BM at autumn, Life history, Year and their interaction | Habitat section |
| E | GR of FL in spring period | FL at early spring, Life history, Habitat section and their interaction |  |
| F | GR of BM in spring period | BM at early spring, Life history, Habitat section and their interaction |  |
| G | GR of FL in spring period | FL at early spring, Life history and their interaction | Habitat section |
| H | GR of BM in spring period | BM at early spring, Life history and their interaction | Habitat section |
| Abbreviations: GR (growth rate), FL (fork length), BM (body mass). | | | |

**Table S2**. Results of eight models predicting growth rate.

| Model | Fixed factor | Estimate | | SE | t value | p-value |
| --- | --- | --- | --- | --- | --- | --- |
| A | Intercept | 0.33 | | 0.04 | 8.20 | <0.001 |
|  | FL at autumn | | 2.4 × 10-6 | 4.1 × 10-4 | -5.85 | <0.001 |
|  | Life history | | -0.21 | 0.06 | -3.59 | <0.001 |
|  | Habitat section | | 1.3 × 10-5 | 1.4 × 10-5 | -0.93 | 0.353 |
|  | Year | | -0.09 | 0.07 | -1.27 | 0.205 |
|  | FL at autumn × Life history | | 1.8 × 10-3 | 5.9 × 10-4 | 3.00 | 0.003 |
|  | FL at autumn × Habitat section | | 7.9 × 10-8 | 1.5 × 10-7 | 0.52 | 0.608 |
|  | Life history × Habitat section | | 9.5 × 10-6 | 1.9 × 10-5 | 0.50 | 0.616 |
|  | FL at autumn × Year | | 5.4 × 10-4 | 6.5 × 10-4 | 0.81 | 0.420 |
|  | Life history × Year | | -0.03 | 0.09 | -0.44 | 0.662 |
|  | Habitat section × Year | | 9.3 × 10-6 | 2.4 × 10-5 | -0.38 | 0.705 |
|  | FL at autumn × Life history × Habitat section | | -8.1 × 10-8 | 2.0 × 10-7 | -0.4 | 0.687 |
|  | FL at autumn × Life history × Year | | 3.1 × 10-4 | 9.3 × 10-4 | 0.34 | 0.622 |
|  | FL at autumn × Habitat section × Year | 1.2 × 10-7 | | 2.5 × 10-7 | 0.49 | 0.621 |
|  | Life history × Habitat section × Year | 2.5 × 10-5 | | 3.1 × 10-5 | 0.80 | 0.427 |
|  | FL at autumn × Life history × Habitat section × Year | 2.5 × 10-7 | | 3.2 × 10-7 | -0.77 | 0.443 |
| Model | Fixed factor | Estimate | | SE | t value | p-value |
| B | Intercept | 6.11 | | 0.55 | 11.20 | <0.001 |
|  | BM at autumn | 3.0 × 10-3 | | 4.3 × 10-4 | -6.91 | <0.001 |
|  | Life history | -3.27 | | 0.79 | -4.17 | <0.001 |
|  | Habitat section | 7.4 × 10-4 | | 1.9 × 10-4 | -3.92 | <0.001 |
|  | Year | -2.57 | | 0.94 | -2.75 | 0.007 |
|  | BM at autumn × Life history | 1.4 × 10-3 | | 5.6 × 10-4 | 2.58 | 0.011 |
|  | BM at autumn × Habitat section | 4.8 × 10-7 | | 1.8 × 10-7 | 2.61 | 0.010 |
|  | Life history × Habitat section | 4.1 × 10-3 | | 2.5 × 10-4 | 1.60 | 0.111 |
|  | BM at autumn × Year | 1.6 × 10-3 | | 7.2 × 10-4 | 2.26 | 0.025 |
|  | Life history × Year | 2.52 | | 1.24 | -0.02 | 0.840 |
|  | Habitat section × Year | 5.3 × 10-3 | | 3.2 × 10-4 | 1.63 | 0.105 |
|  | BM at autumn × Life history × Habitat section | 2.4 × 10-7 | | 2.2 × 10-7 | -1.10 | 0.273 |
|  | BM at autumn × Life history × Year | 4.8 × 10-5 | | 1.0 × 10-4 | 0.05 | 0.962 |
|  | BM at autumn × Habitat section × Year | 6.1 × 10-7 | | 2.7 × 10-7 | -2.28 | 0.024 |
|  | Life history × Habitat section × Year | 2.1 × 10-4 | | 4.1 × 10-4 | -0.05 | 0.96 |
|  | BM at autumn × Life history × Habitat section × Year | 6.9 × 10-8 | | 3.6 × 10-7 | -0.02 | 0.85 |
| Model | Fixed factor | Estimate | | SE | t value | p-value |
| C | Intercept | 0.28 | | 0.02 | 11.56 | <0.001 |
|  | FL at autumn | 2.0 × 10-3 | | 2.5 × 10-4 | -7.88 | <0.001 |
|  | Life history | -0.17 | | 0.03 | -5.42 | <0.001 |
|  | Year | -0.09 | | 0.03 | -2.65 | 0.009 |
|  | FL at autumn × Life history | 1.4 × 10-3 | | 3.3 × 10-4 | 4.15 | <0.001 |
|  | FL at autumn × Year | 6.4 × 10-4 | | 3.5 × 10-4 | 1.86 | 0.064 |
|  | Life history × Year | 0.02 | | 0.04 | 0.65 | 0.518 |
|  | FL at autumn × Life history × Year | -1.2 × 10-3 | | 4.5 × 10-4 | -0.47 | 0.638 |
| Model | Fixed factor | Estimate | | SE | t value | p-value |
| D | Intercept | 4.21 | | 0.32 | 13.12 | <0.001 |
|  | BM at autumn | -1.8 × 10-3 | | 2.8 × 10-4 | -6.30 | <0.001 |
|  | Life history | -2.35 | | 0.41 | -5.75 | <0.001 |
|  | Year | -1.12 | | 0.47 | -2.40 | 0.017 |
|  | BM at autumn × Life history | 7.8 × 10-4 | | 3.6 × 10-4 | 2.17 | 0.031 |
|  | BM at autumn × Year | 1.0 × 10-4 | | 3.8 × 10-4 | 0.27 | 0.79 |
|  | Life history × Year | 3.1 | | 0.60 | 0.52 | 0.603 |
|  | BM at autumn × Life history × Year | 1.5 × 10-4 | | 5.3 × 10-4 | 0.28 | 0.781 |
| Model | Fixed factor | Estimate | | SE | t value | p-value |
| E | Intercept | 0.71 | | 0.14 | 5.11 | <0.001 |
|  | FL at early spring | 3.2 × 10-3 | | 1.3 × 10-3 | -2.47 | 0.014 |
|  | Life history | -0.43 | | 0.20 | -2.13 | 0.035 |
|  | Habitat | 2.3 × 10-5 | | 5.7 × 10-5 | 0.40 | 0.687 |
|  | FL at early spring × Life history | 2.5 × 10-3 | | 2.0 × 10-3 | 1.25 | 0.215 |
|  | Habitat × FL at early spring | 5.3 × 10-7 | | 5.2 × 10-7 | -0.60 | 0.548 |
|  | Habitat × Life history | 4.0 × 10-5 | | 7.3 × 10-5 | -0.55 | 0.558 |
|  | FL at early spring × Life history × Habitat | 5.3 × 10-7 | | 7.2 × 10-7 | 0.74 | 0.463 |
| Model | Fixed factor | Estimate | | SE | t value | p-value |
| F | Intercept | 2.1 × 102 | | 2.66 | 7.78 | <0.001 |
|  | BM at early spring | -5.7 × 10-3 | | 1.9 × 10-3 | -2.97 | 0.003 |
|  | Life history | -1.5 × 102 | | 3.78 | -3.97 | <0.001 |
|  | Habitat | 1.3 × 10-2 | | 1.0 × 10-2 | -1.22 | 0.223 |
|  | BM at early spring × Life history | 1.1 × 10-2 | | 3.4 × 10-3 | 3.33 | 0.001 |
|  | Habitat × BM at early spring | 8.4 × 10-7 | | 7.7 × 10-7 | 1.10 | 0.273 |
|  | Habitat × Life history | 7.5 × 10-4 | | 1.4 × 10-2 | 0.56 | 0.577 |
|  | BM at early spring × Life history × Habitat | 3.3 × 10-7 | | 1.2 × 10-6 | 0.27 | 0.790 |
| Model | Fixed factor | Estimate | | SE | t value | p-value |
| G | Intercept | 0.77 | | 0.07 | 10.49 | <0.001 |
|  | FL at early spring | 3.9 × 10-3 | | 6.7 × 10-4 | -5.88 | <0.001 |
|  | Life history | -0.53 | | 0.10 | -5.46 | <0.001 |
|  | FL at early spring × Life history | 3.8 × 10-3 | | 9.5 × 10-4 | 4.06 | <0.001 |
| Model |  | Estimate | | SE | t value | p-value |
| H | Intercept | 1.8 × 102 | | 1.35 | 13.23 | <0.001 |
|  | BM at early spring | 3.9 × 10-3 | | 9.8 × 10-4 | -3.94 | <0.001 |
|  | Life history | -1.3 × 102 | | 1.83 | -7.22 | <0.001 |
|  | BM at early spring × Life history | 1.2 × 10-2 | | 1.6 × 10-3 | 7.76 | <0.001 |

Abbreviations: FL (fork length), BM (body mass).


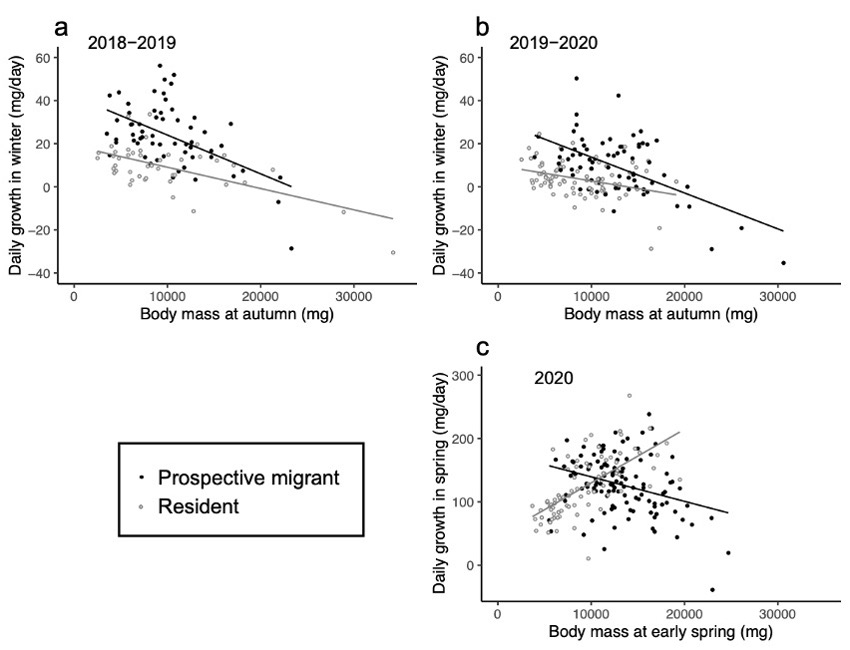


**Figure S1.** Relationship between size (body mass) and the subsequent growth rate of prospective migrants (black) and residents (grey) of masu salmon juveniles. (a) daily growth of body mass in winter period (2018−2019); (b) daily growth of body mass in winter period (2019−2020); (c) daily growth of body mass in spring period (2020). Regression lines: (a) Y = -1.7 × 10-3X + 41.99, p < 0.001, Adjusted R2 = 0.28, for prospective migrants; Y = -9.9 × 10-4X + 18.95, p < 0.001, Adjusted R2 = 0.34, for residents; (b) Y = -1.6 × 10-3X + 30.40, p < 0.001, Adjusted R2 = 0.31, for prospective migrants; Y = -7.1 × 10-4X + 9.80, p = 0.002, Adjusted R2 = 0.10, for residents; (c) Y = -3.9 × 10-3X + 178.22, p < 0.001, Adjusted R2 = 0.10, for prospective migrants; Y = 8.5 × 10-3X + 45.34, p < 0.001, Adjusted R2 = 0.43, for residents.

As we predicted, while the prospective migrants with smaller size exhibited higher growth rate in the pre-migration period, such trend was not found in the residents and, rather, the opposite trend was found in one case (c). The heavier residents at the capture survey in early spring grew better in the subsequent spring period than lighter residents. This result might be explained by specific life history of the residents. Among the residents, a part of individuals participates in the reproduction in the next autumn (Tamate and Maekawa 2002). If the residents with larger size are destined to be the reproductive members, they should invest more resource to development of reproductive organs rather than somatic growth and, thus, better growth in body mass of the larger residents in spring period is reasonable.

**REFERENCE**

Tamate, T., & Maekawa, K. (2002). Individual growth and phase differentiation of lacustrine masu salmon, *Oncorhynchus masou*, under artificial rearing conditions. *Ichthyological Research*, *49*(4), 397–400. https://doi.org/10.1007/s102280200061
